# Supplementary material for: Recycling hazardous and energy-demanding piezoelectric ceramics using an oxide–halide perovskite upside-down composite method
Source: Royal Society of Chemistry journal article supplement (doi:10.1039/d3su00348e), 2024-01-01
Supplement: d3su00348e1.pdf [file d3su00348e1.pdf]

Supporting Information

**Recycling hazardous and energy-demanding piezoelectric ceramics using  
oxide-halide perovskite upside-down composite method**

Sivagnana Sundaram Anandakrishnan, Mohadeseh Tabeshfar, Mikko Nelo, Jani Peräntie,  
Heli Jantunen, Jari Juuti, Yang Bai\*

Microelectronics Research Unit, Faculty of Information and Electrical Engineering, University of  
Oulu, FI-90570 Oulu, Finland

\*Corresponding author: [yang.bai@oulu.fi](mailto:yang.bai@oulu.fi)

## Details of fabricated ceramic and composite samples

Details of the fabricated samples including amount of sintered crushed filler used to prepare each composite where applicable, weight, and dimensions are listed in Table S1. Pictures of the sintered ceramic pellets and the upside-down composites made with corresponding fillers are shown in Figure S1.

Table S1. Details of the fabricated ceramic pellets and composite samples

| Sample ID | Sample description                                                                                                                            | Amount of filler used in each composite sample (g) | Weight (g)  | Thickness (mm) | Diameter (mm) |
|-----------|-----------------------------------------------------------------------------------------------------------------------------------------------|----------------------------------------------------|-------------|----------------|---------------|
| BT-P      | BaTiO <sub>3</sub> ceramic pellet                                                                                                             | -                                                  | 0.23        | 0.738 ± 0.002  | 8.21 ± 0.00   |
| KNBNNO-P  | (K <sub>0.52</sub> Na <sub>0.38</sub> Ba <sub>0.03</sub> )<br>(Nb <sub>0.985</sub> Ni <sub>0.015</sub> )O <sub>2.9575</sub><br>ceramic pellet | -                                                  | 0.22        | 1.003 ± 0.002  | 8.29 ± 0.01   |
| H-PZT-P   | Hard-type PZT ceramic pellet                                                                                                                  | -                                                  | 0.48        | 0.967 ± 0.003  | 8.43 ± 0.01   |
| S-PZT-P   | Soft-type PZT ceramic pellet                                                                                                                  | -                                                  | 0.74 ± 0.02 | 1.100 ± 0.061  | 10.92 ± 0.11  |
| BT-C      | BaTiO <sub>3</sub> composite                                                                                                                  | 0.6                                                | 0.63 ± 0.18 | 1.737 ± 0.384  | 10.07 ± 0.01  |
| KNBNNO-C  | (K <sub>0.52</sub> Na <sub>0.38</sub> Ba <sub>0.03</sub> )<br>(Nb <sub>0.985</sub> Ni <sub>0.015</sub> )O <sub>2.9575</sub><br>composite      | 0.5                                                | 0.55 ± 0.06 | 1.931 ± 0.180  | 10.06 ± 0.02  |
| H-PZT-C   | Hard-type PZT composite                                                                                                                       | 0.8                                                | 0.76 ± 0.05 | 1.616 ± 0.105  | 10.06 ± 0.02  |
| S-PZT-C   | Soft-type PZT composite                                                                                                                       | 0.8                                                | 0.82 ± 0.02 | 1.706 ± 0.043  | 10.08 ± 0.01  |

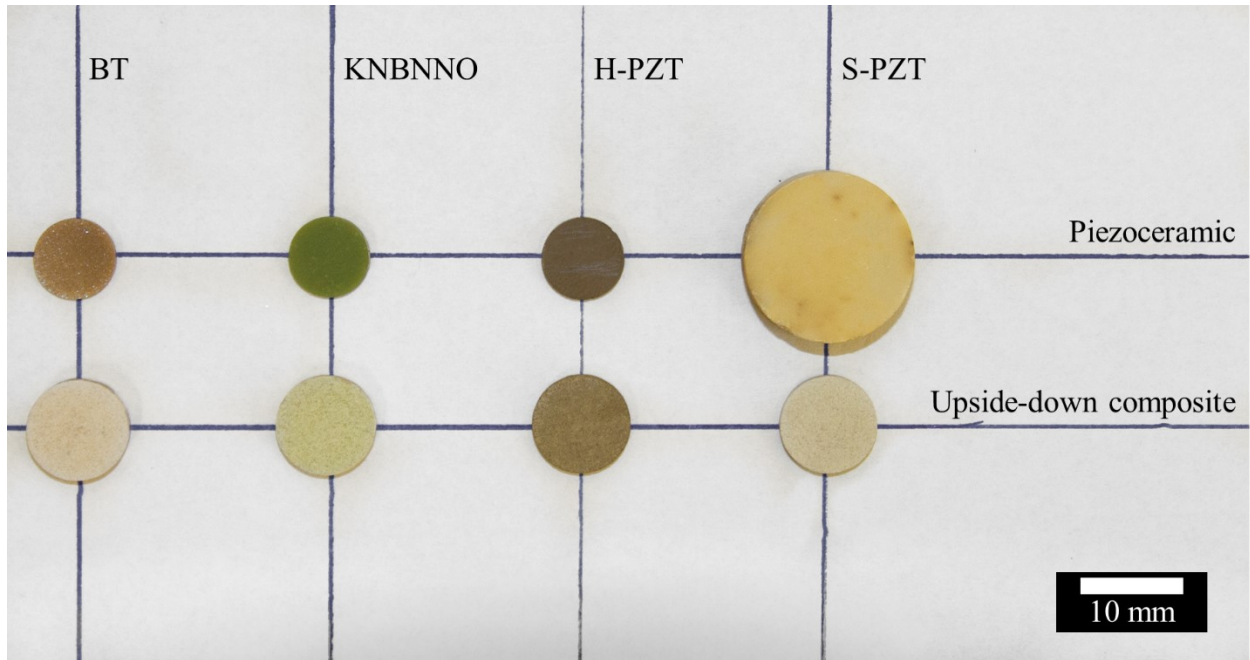

Figure S1. Pictures of sintered ceramic pellets and composite samples fabricated in this work.

## XRD results of ceramic fillers

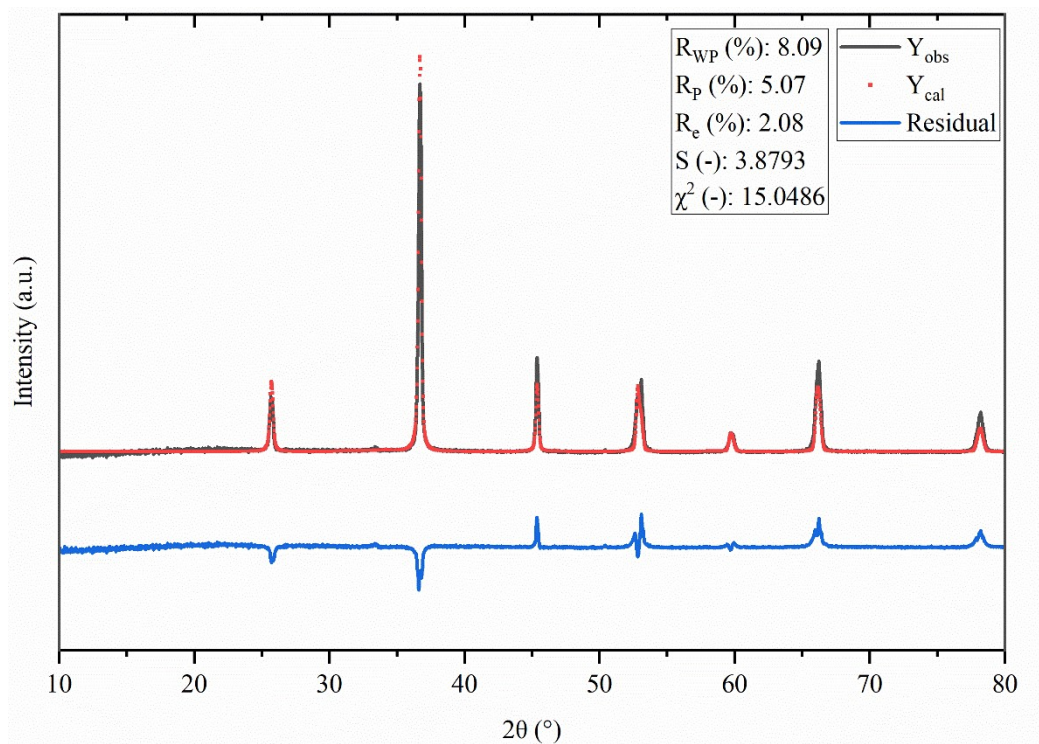

Figure S2. XRD reflections, calculated curve and residual error after Rietveld refinement, and the refinement parameters obtained for the BT filler

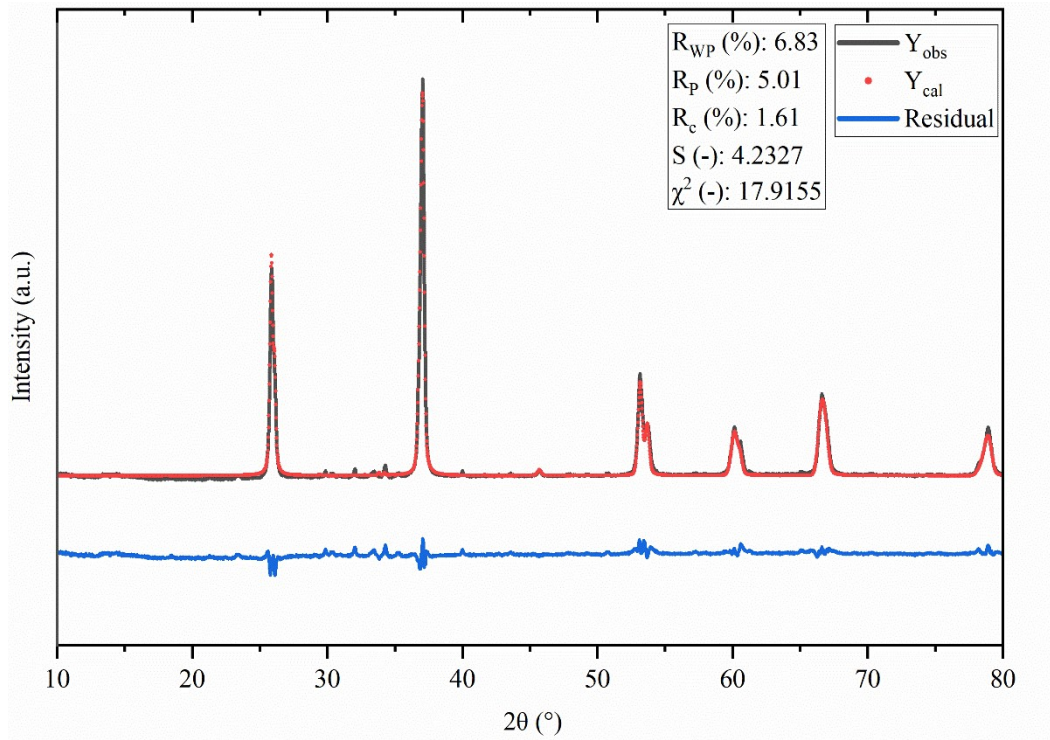

Figure S3. XRD reflections, calculated curve and residual error after Rietveld refinement, and the refinement parameters obtained for the KNBNNO filler

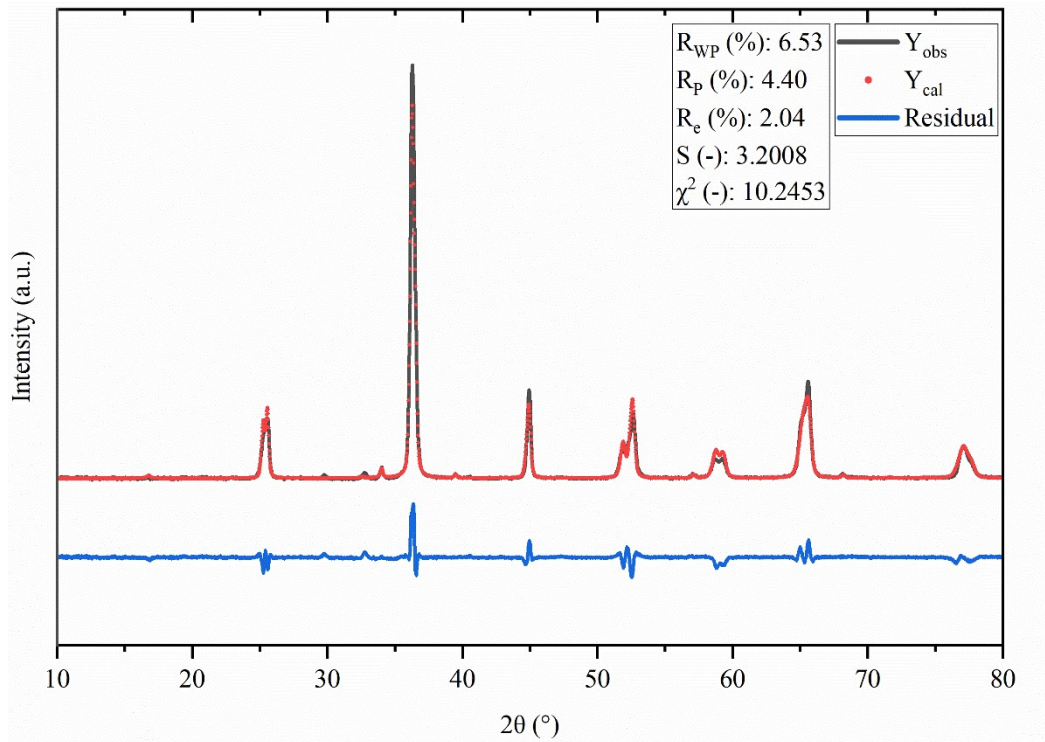

Figure S4. XRD reflections, calculated curve and residual error after Rietveld refinement, and the refinement parameters obtained for the H-PZT filler

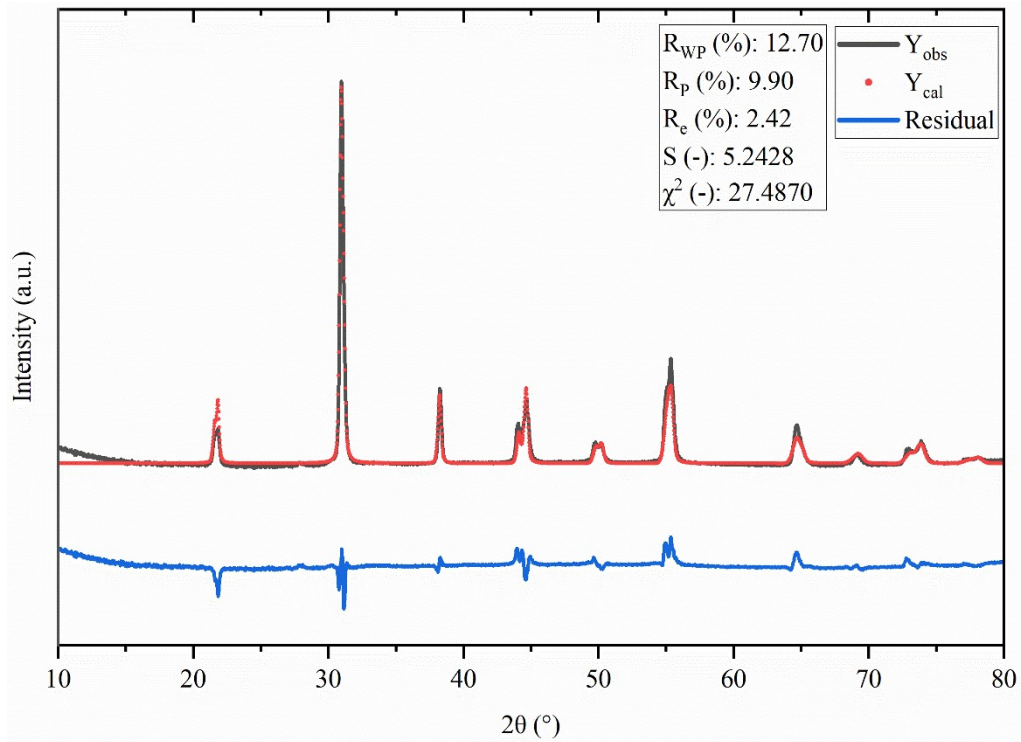

Figure S5. XRD reflections, calculated curve and residual error after Rietveld refinement, and the refinement parameters obtained for the S-PZT filler

Table S2. List of XRD reflections for BT

| <b>2<math>\theta</math> (°)</b> | <b>Intensity (normalized)</b> | <b>d-space (Å)</b> | <b>Diffraction plane</b> |
|---------------------------------|-------------------------------|--------------------|--------------------------|
| 25.73                           | 16.6                          | 4.0179             | Amm2 (0 1 1)             |
| 25.85                           | 13.7                          | 3.9995             | Amm2 (1 0 0)             |
| 31.82                           | 0.3                           | 3.2633             | I4/mmm (1 1 0)           |
| 33.40                           | 1.0                           | 3.1125             | Unidentified             |
| 34.07                           | 0.4                           | 3.0530             | I4/mmm (1 0 3)           |
| 36.70                           | 30.9                          | 2.8412             | Amm2 (0 2 0)             |
| 36.70                           | 30.6                          | 2.8410             | Amm2 (0 0 2)             |
| 36.79                           | 100.0                         | 2.8345             | Amm2 (1 1 1)             |
| 45.43                           | 12.6                          | 2.3162             | Amm2 (1 2 0)             |
| 45.44                           | 12.9                          | 2.3161             | Amm2 (1 0 2)             |
| 45.61                           | 0.1                           | 2.3075             | I4/mmm (2 0 0)           |
| 52.88                           | 24.5                          | 2.0090             | Amm2 (0 2 2)             |
| 53.14                           | 12.1                          | 1.9997             | Amm2 (2 0 0)             |
| 58.14                           | 0.1                           | 1.8409             | I4/mmm (2 1 3)           |
| 59.71                           | 1.3                           | 1.7969             | Amm2 (0 3 1)             |
| 59.71                           | 1.5                           | 1.7968             | Amm2 (0 1 3)             |
| 59.77                           | 4.0                           | 1.7952             | Amm2 (1 2 2)             |
| 59.95                           | 2.5                           | 1.7903             | Amm2 (2 1 1)             |
| 66.15                           | 10.1                          | 1.6391             | Amm2 (1 3 1)             |
| 66.15                           | 9.8                           | 1.6390             | Amm2 (1 1 3)             |
| 66.32                           | 5.8                           | 1.6353             | Amm2 (2 2 0)             |
| 66.32                           | 5.8                           | 1.6353             | Amm2 (2 0 2)             |
| 78.05                           | 1.8                           | 1.4206             | Amm2 (0 4 0)             |
| 78.05                           | 1.8                           | 1.4205             | Amm2 (0 0 4)             |
| 78.26                           | 7.1                           | 1.4173             | Amm2 (2 2 2)             |



Table S3. Phase information of the assigned phases according to the XRD reflections from the

BT filler

| <b>Parameter</b>                                 | <b>Primary phase (⊖)</b>                                 | <b>Secondary phase (#)</b>       |
|--------------------------------------------------|----------------------------------------------------------|----------------------------------|
| Chemical formula                                 | Ba(Ti <sub>0.95</sub> Zr <sub>0.05</sub> )O <sub>3</sub> | Ba <sub>2</sub> ZrO <sub>4</sub> |
| Composition                                      | Ba O <sub>3</sub> Ti <sub>0.95</sub> Zr <sub>0.05</sub>  | Ba O <sub>4</sub> Zr             |
| Z-value                                          | 2                                                        | 2                                |
| Concentration (%)                                | 99.5 (4)                                                 | 0.5 (4)                          |
| RIR value                                        | 4.654                                                    | 5.656                            |
| DB card no.                                      | 00-066-0857                                              | 04-005-5869                      |
| Reference                                        | 0PCOMC                                                   | RJICAQ                           |
| Crystal system                                   | Orthorhombic                                             | Tetragonal                       |
| Space group                                      | 38: Amm2                                                 | 139: I4/mmm                      |
| a (ang.)                                         | 4.0012                                                   | 4.1955                           |
| b (ang.)                                         | 5.6932                                                   | 4.1955                           |
| c (ang.)                                         | 5.6840                                                   | 13.3675                          |
| α (ang.)                                         | 90                                                       | 90                               |
| β (ang.)                                         | 90                                                       | 90                               |
| γ (ang.)                                         | 90                                                       | 90                               |
| Calculated density (g/cm <sup>3</sup> )          | 5.6265                                                   | 6.0675                           |
| Mass absorption coefficient (cm <sup>2</sup> /g) | 365.077                                                  | 347.2666                         |
| Phase reg. method                                | ICDD (PDF-4+ 2023)                                       | ICDD (PDF-4+ 2023)               |
| Molar ratio (%)                                  | 99.7 (2)                                                 | 0.3 (2)                          |

Table S4. List of XRD reflections for KNBNNO

| <b>2<math>\theta</math> (°)</b> | <b>Intensity (normalized)</b> | <b>d-space (Å)</b> | <b>Diffraction plane</b> |
|---------------------------------|-------------------------------|--------------------|--------------------------|
| 25.85                           | 64.0                          | 3.9994             | Amm2 (0 1 1)             |
| 26.09                           | 31.3                          | 3.9633             | Amm2 (1 0 0)             |
| 29.49                           | 0.2                           | 3.5146             | P4bm (3 2 0)             |
| 30.36                           | 1.1                           | 3.4162             | Unidentified             |
| 32.80                           | 0.1                           | 3.1680             | P4bm (4 0 0)             |
| 33.84                           | 0.9                           | 3.0734             | P4bm (4 1 0)             |
| 34.23                           | 0.8                           | 3.0391             | P4bm (2 1 1)             |
| 34.85                           | 0.2                           | 2.9868             | P4bm (3 3 0)             |
| 36.80                           | 26.2                          | 2.8338             | Amm2 (0 0 2)             |
| 36.80                           | 1.5                           | 2.8336             | P4bm (4 2 0)             |
| 36.96                           | 24.9                          | 2.8222             | Amm2 (0 2 0)             |
| 37.05                           | 100.0                         | 2.8151             | Amm2 (1 1 1)             |
| 37.17                           | 2.6                           | 2.8066             | P4bm (2 2 1)             |
| 39.02                           | 1.4                           | 2.6783             | P4bm (3 1 1)             |
| 41.67                           | 0.1                           | 2.5151             | P4bm (3 2 1)             |
| 45.66                           | 1.6                           | 2.3052             | Amm2 (1 0 2)             |
| 45.79                           | 0.3                           | 2.2989             | Amm2 (1 2 0)             |
| 53.14                           | 29.7                          | 1.9997             | Amm2 (0 2 2)             |
| 53.66                           | 15.8                          | 1.9816             | Amm2 (2 0 0)             |
| 59.90                           | 3.8                           | 1.7915             | Amm2 (0 1 3)             |
| 60.12                           | 3.8                           | 1.7856             | Amm2 (0 3 1)             |
| 60.13                           | 7.6                           | 1.7853             | Amm2 (1 2 2)             |
| 60.50                           | 7.3                           | 1.7756             | Amm2 (2 1 1)             |
| 66.45                           | 12.6                          | 1.6325             | Amm2 (1 1 3)             |
| 66.65                           | 11.4                          | 1.6280             | Amm2 (1 3 1)             |
| 66.84                           | 5.6                           | 1.6240             | Amm2 (2 0 2)             |
| 66.94                           | 5.4                           | 1.6218             | Amm2 (2 2 0)             |
| 78.29                           | 2.1                           | 1.4169             | Amm2 (0 0 4)             |
| 78.67                           | 3.0                           | 1.4111             | Amm2 (0 4 0)             |
| 78.91                           | 10.7                          | 1.4076             | Amm2 (2 2 2)             |

Table S5. Phase information of the assigned phases according to the XRD reflections from the KNBNNO filler

| <b>Parameter</b>                                 | <b>Primary phase (□)</b>                               | <b>Secondary phase (#)</b>        |
|--------------------------------------------------|--------------------------------------------------------|-----------------------------------|
| Chemical formula                                 | $(K_{0.49}Na_{0.49}Ba_{0.02})(Nb_{0.99}Ni_{0.01})O_3$  | $Ba_3Nb_{4.67}Ni_{0.33}O_{15}$    |
| Composition                                      | $Ba_{0.02} K_{0.49} Na_{0.49} Nb_{0.99} Ni_{0.01} O_3$ | $Ba_3 Nb_{4.67} Ni_{0.33} O_{15}$ |
| Z-value                                          | 2                                                      | 2                                 |
| Concentration (%)                                | 99.2                                                   | 0.8                               |
| RIR value                                        | 3.664                                                  | 2.802                             |
| DB card no.                                      | 01-087-7260                                            | 04-006-0584                       |
| Reference                                        | 432352                                                 | 550973                            |
| Crystal system                                   | Orthorhombic                                           | Tetragonal                        |
| Space group                                      | 38: Amm2                                               | 100: P4bm                         |
| a (ang.)                                         | 3.9633                                                 | 12.6721                           |
| b (ang.)                                         | 5.6444                                                 | 12.6721                           |
| c (ang.)                                         | 5.6676                                                 | 3.6006                            |
| $\alpha$ (ang.)                                  | 90                                                     | 90                                |
| $\beta$ (ang.)                                   | 90                                                     | 90                                |
| $\gamma$ (ang.)                                  | 90                                                     | 90                                |
| Calculated density (g/cm <sup>3</sup> )          | 4.5486                                                 | 6.413                             |
| Mass absorption coefficient (cm <sup>2</sup> /g) | 150.1362                                               | 266.2282                          |
| Phase reg. method                                | ICDD (PDF-4+ 2023)                                     | ICDD (PDF-4+ 2023)                |
| Molar ratio (%)                                  | 99.9                                                   | 0.1                               |

Table S6. List of XRD reflections for H-PZT

| <b>2<math>\theta</math> (°)</b> | <b>Intensity (normalized)</b> | <b>d-space (Å)</b> | <b>Diffraction plane</b> |
|---------------------------------|-------------------------------|--------------------|--------------------------|
| 16.84                           | 0.8                           | 6.1094             | Fd-3m (1 1 1)            |
| 25.28                           | 15.4                          | 4.0869             | P4mm (0 0 1)             |
| 25.60                           | 20.4                          | 4.0374             | P4mm (1 0 0)             |
| 29.75                           | 1.1                           | 3.4838             | Unidentified             |
| 32.56                           | 0.6                           | 3.1906             | Fd-3m (3 1 1)            |
| 34.05                           | 3.0                           | 3.0547             | Fd-3m (2 2 2)            |
| 36.29                           | 100.0                         | 2.8722             | P4mm (1 0 1)             |
| 36.52                           | 51.8                          | 2.8549             | P4mm (1 1 0)             |
| 39.52                           | 1.3                           | 2.6455             | Fd-3m (4 0 0)            |
| 43.24                           | 0.2                           | 2.4276             | Fd-3m (3 3 1)            |
| 44.94                           | 23.4                          | 2.3404             | P4mm (1 1 1)             |
| 51.92                           | 10.8                          | 2.0435             | P4mm (0 0 2)             |
| 52.11                           | 0.1                           | 2.0365             | Fd-3m (3 3 3)            |
| 52.60                           | 25.0                          | 2.0187             | P4mm (2 0 0)             |
| 57.13                           | 1.3                           | 1.8706             | Fd-3m (4 4 0)            |
| 58.76                           | 8.0                           | 1.8232             | P4mm (1 0 2)             |
| 59.23                           | 4.9                           | 1.8100             | P4mm (2 0 1)             |
| 59.39                           | 3.6                           | 1.8056             | P4mm (2 1 0)             |
| 60.01                           | 0.2                           | 1.7887             | Fd-3m (5 3 1)            |
| 65.14                           | 11.5                          | 1.6617             | P4mm (1 1 2)             |
| 65.58                           | 24.8                          | 1.6516             | P4mm (2 1 1)             |
| 68.21                           | 1.0                           | 1.5953             | Fd-3m (6 2 2)            |
| 71.69                           | 0.2                           | 1.5274             | Fd-3m (4 4 4)            |
| 77.05                           | 8.8                           | 1.4361             | P4mm (2 0 2)             |
| 77.60                           | 5.3                           | 1.4274             | P4mm (2 2 0)             |

Table S7. Phase information of the assigned phases according to the XRD reflections from the

H-PZT filler

| Parameter                                        | Primary phase (□)                                                                             | Secondary phase (#)                                   |
|--------------------------------------------------|-----------------------------------------------------------------------------------------------|-------------------------------------------------------|
| Chemical formula                                 | $\text{Pb}(\text{Ti}_{0.45}\text{Zr}_{0.45}\text{Sb}_{0.05}\text{Mn}_{0.05})\text{O}_3$       | $\text{Pb}(\text{Ti}_{0.5}\text{Zr}_{0.5})\text{O}_3$ |
| Composition                                      | Mn <sub>0.05</sub> O <sub>3</sub> Pb Sb <sub>0.05</sub> Ti <sub>0.45</sub> Zr <sub>0.45</sub> | O <sub>3</sub> Pb Ti <sub>0.5</sub> Zr <sub>0.5</sub> |
| Z-value                                          | 1                                                                                             | 16                                                    |
| Concentration (%)                                | 98.99 (9)                                                                                     | 1.01 (9)                                              |
| RIR value                                        | 4.216                                                                                         | 11.136                                                |
| DB card no.                                      | 00-067-0380                                                                                   | 04-014-5162                                           |
| Reference                                        | -                                                                                             | 1217491                                               |
| Crystal system                                   | Tetragonal                                                                                    | Cubic                                                 |
| Space group                                      | 99: P4mm                                                                                      | 227: Fd-3m, choice-2                                  |
| a (ang.)                                         | 4.0374                                                                                        | 10.5819                                               |
| b (ang.)                                         | 4.0374                                                                                        | 10.5819                                               |
| c (ang.)                                         | 4.0869                                                                                        | 10.5819                                               |
| α (ang.)                                         | 90                                                                                            | 90                                                    |
| β (ang.)                                         | 90                                                                                            | 90                                                    |
| γ (ang.)                                         | 90                                                                                            | 90                                                    |
| Calculated density (g/cm <sup>3</sup> )          | 8.1414                                                                                        | 7.2816                                                |
| Mass absorption coefficient (cm <sup>2</sup> /g) | 256.0721                                                                                      | 252.0801                                              |
| Phase reg. method                                | ICDD (PDF-4+ 2023)                                                                            | ICDD (PDF-4+ 2023)                                    |
| Molar ratio (%)                                  | 98.98 (9)                                                                                     | 1.02 (9)                                              |

Table S8. List of XRD reflections for S-PZT

| <b>2θ (°)</b> | <b>Intensity (normalized)</b> | <b>d-space (Å)</b> | <b>Diffraction plane</b> |
|---------------|-------------------------------|--------------------|--------------------------|
| 21.69         | 9.9                           | 4.0948             | P4mm (0 0 1)             |
| 21.94         | 17.6                          | 4.0484             | P4mm (1 0 0)             |
| 31.04         | 100.0                         | 2.8789             | P4mm (1 0 1)             |
| 31.22         | 51.8                          | 2.8627             | P4mm (1 1 0)             |
| 38.33         | 21.1                          | 2.3462             | P4mm (1 1 1)             |
| 44.20         | 9.0                           | 2.0474             | P4mm (0 0 2)             |
| 44.73         | 22.9                          | 2.0242             | P4mm (2 0 0)             |
| 49.70         | 4.5                           | 1.8330             | Unidentified             |
| 49.87         | 4.3                           | 1.8271             | P4mm (1 0 2)             |
| 50.24         | 2.9                           | 1.8146             | P4mm (2 0 1)             |
| 50.36         | 2.7                           | 1.8105             | P4mm (2 1 0)             |
| 55.10         | 10.7                          | 1.6653             | P4mm (1 1 2)             |
| 55.44         | 21.4                          | 1.6559             | P4mm (2 1 1)             |
| 64.70         | 6.1                           | 1.4395             | P4mm (2 0 2)             |
| 65.12         | 3.7                           | 1.4313             | P4mm (2 2 0)             |
| 69.21         | 1.8                           | 1.3563             | P4mm (2 1 2)             |
| 69.51         | 0.4                           | 1.3512             | P4mm (2 2 1)             |
| 73.10         | 2.6                           | 1.2934             | P4mm (1 0 3)             |
| 73.88         | 2.5                           | 1.2817             | P4mm (3 0 1)             |
| 73.98         | 2.7                           | 1.2802             | P4mm (3 1 0)             |
| 77.40         | 0.4                           | 1.2321             | P4mm (1 1 3)             |
| 78.16         | 1.3                           | 1.2219             | P4mm (3 1 1)             |

Table S9. Phase information of the assigned phases according to the XRD reflections from the S-  
PZT filler

| <b>Parameter</b>                                       | <b>Primary phase (<math>\square</math>)</b>                                    |
|--------------------------------------------------------|--------------------------------------------------------------------------------|
| Chemical formula                                       | $(\text{Pb}_{0.91}\text{Sr}_{0.06})(\text{Ti}_{0.5}\text{Zr}_{0.5})\text{O}_3$ |
| Composition                                            | $\text{O}_3 \text{Pb}_{0.91} \text{Sr}_{0.06} \text{Ti}_{0.5} \text{Zr}_{0.5}$ |
| Z-value                                                | 1                                                                              |
| Concentration (%)                                      | 100                                                                            |
| RIR value                                              | 11.202                                                                         |
| DB card no.                                            | 01-070-6380                                                                    |
| Reference                                              | 91813                                                                          |
| Crystal system                                         | Tetragonal                                                                     |
| Space group                                            | 99: P4mm                                                                       |
| a (ang.)                                               | 4.0484                                                                         |
| b (ang.)                                               | 4.0484                                                                         |
| c (ang.)                                               | 4.0948                                                                         |
| $\alpha$ (ang.)                                        | 90                                                                             |
| $\beta$ (ang.)                                         | 90                                                                             |
| $\gamma$ (ang.)                                        | 90                                                                             |
| Calculated density ( $\text{g}/\text{cm}^3$ )          | 7.7035                                                                         |
| Mass absorption coefficient ( $\text{cm}^2/\text{g}$ ) | 167.9128                                                                       |
| Phase reg. method                                      | ICDD (PDF-4+ 2023)                                                             |
| Molar ratio (%)                                        | 100                                                                            |

## EPMA results

Table S10. Summary of theoretical molecular weights and nominal chemical formulas calculated from EPMA results for the fabricated ceramics

| Ceramic material | Constituent element   | Theoretical molecular weight (g/mol) | Nominal chemical formula                                                                                                                                         |
|------------------|-----------------------|--------------------------------------|------------------------------------------------------------------------------------------------------------------------------------------------------------------|
| BT               | Ba, Sr, Ti, Zr, O     | $229.33 \pm 2.41$                    | $(\text{Ba}_{0.96 \pm 0.02} \text{Sr}_{0.005 \pm 0.001}) (\text{Ti}_{0.97 \pm 0.00} \text{Zr}_{0.03 \pm 0.00}) \text{O}_{2.97 \pm 0.02}$                         |
| KNBNNO           | K, Na, Ba, Nb, Ni, O  | $172.73 \pm 2.75$                    | $(\text{K}_{0.52 \pm 0.06} \text{Na}_{0.30 \pm 0.05} \text{Ba}_{0.04 \pm 0.03}) (\text{Nb}_{0.99 \pm 0.00} \text{Ni}_{0.01 \pm 0.00}) \text{O}_{2.94 \pm 0.04}$  |
| H-PZT            | Pb, Zr, Ti, Sb, Mn, O | $314.98 \pm 5.63$                    | $(\text{Pb}_{0.95 \pm 0.02}) (\text{Sb}_{0.06 \pm 0.03} \text{Zr}_{0.44 \pm 0.02} \text{Ti}_{0.48 \pm 0.04} \text{Mn}_{0.01 \pm 0.00}) \text{O}_{2.95 \pm 0.02}$ |
| S-PZT            | Pb, Zr, Ti, Sr, O     | $307.09 \pm 4.05$                    | $(\text{Pb}_{0.88 \pm 0.02} \text{Sr}_{0.07 \pm 0.003}) (\text{Zr}_{0.54 \pm 0.01} \text{Ti}_{0.46 \pm 0.01}) \text{O}_{2.95 \pm 0.02}$                          |



## Microstructure of upside-down composites

Microstructure of the BT composite is provided in Figure 1. FESEM (field-emission scanning electron microscope) micrographs and EDS (energy dispersive X-ray spectroscopy) maps for composites of KNBNNO, H-PZT, and S-PZT are shown in Figures S6-S8 below.

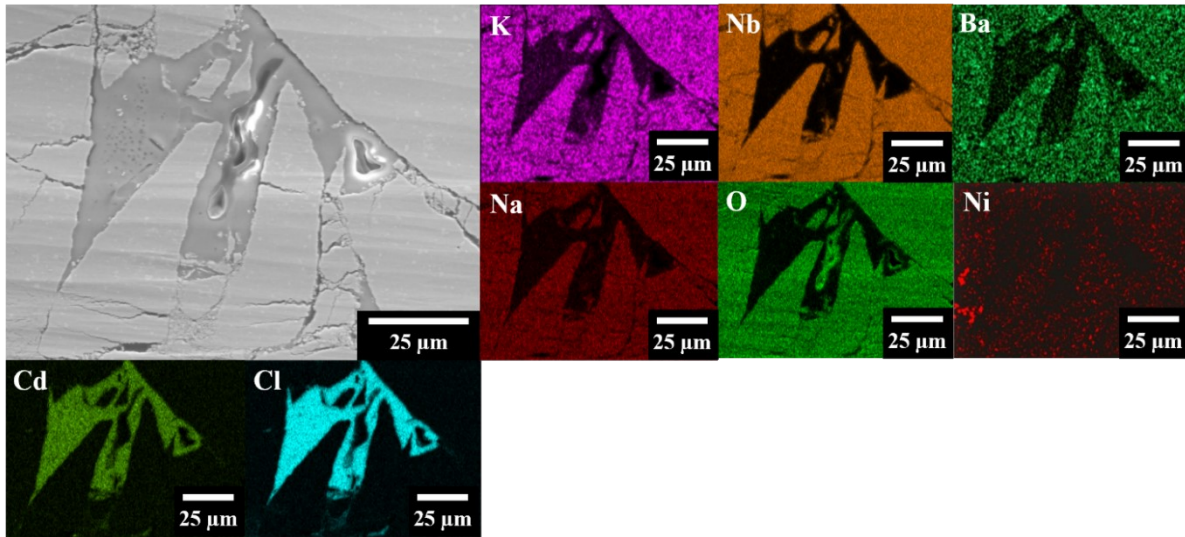

Figure S6. FESEM micrograph and EDS maps of upside-down composite KNBNNO-C

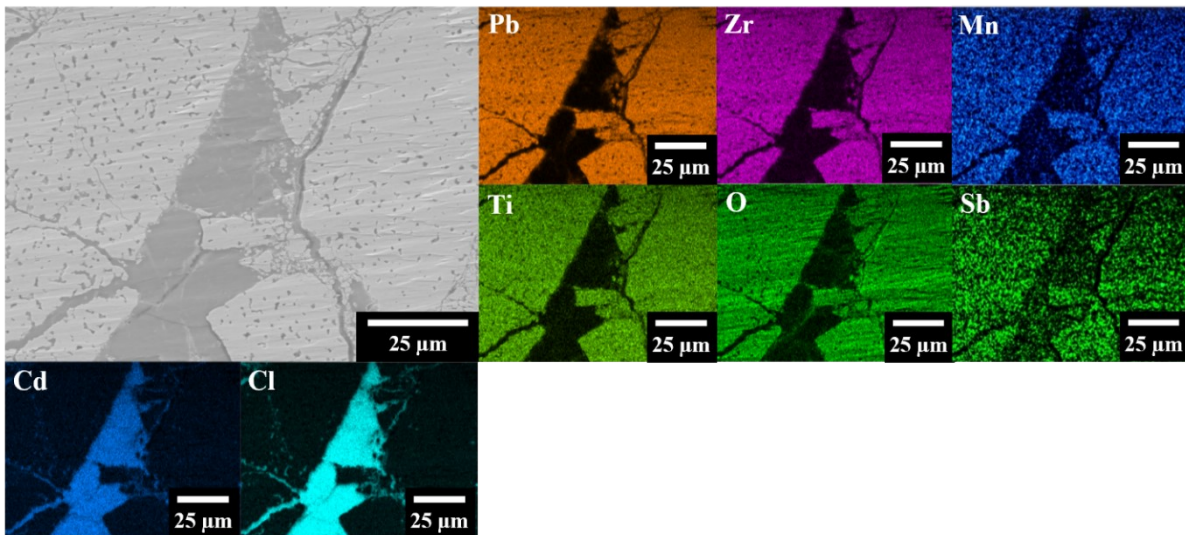

Figure S7. FESEM micrograph and EDS maps of upside-down composite H-PZT-C

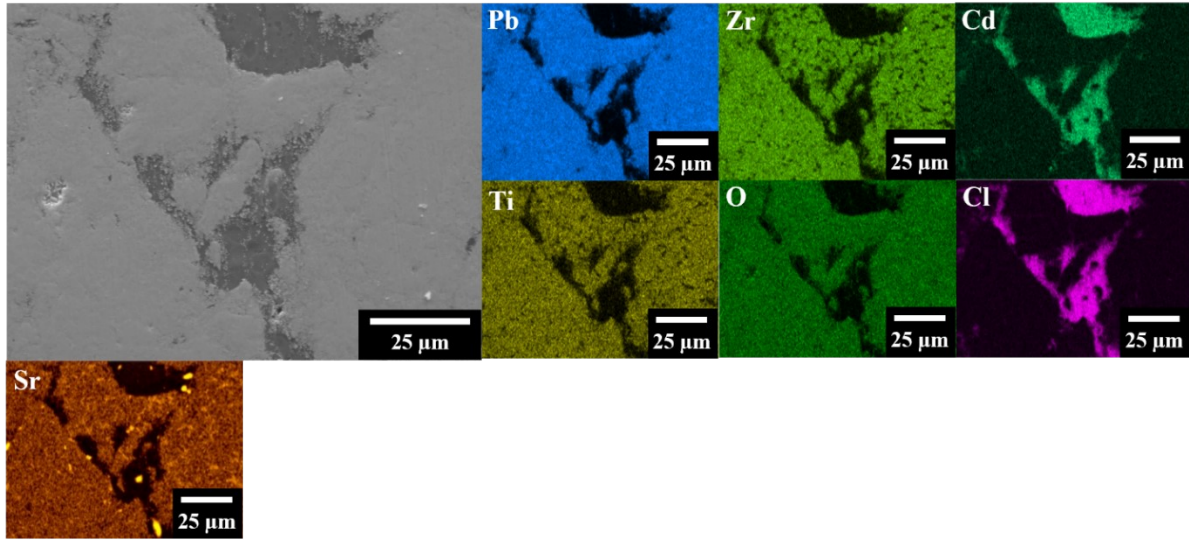

Figure S8. FESEM micrographs and EDS maps of upside-down composite S-PZT-C

**Frequency-dependent dielectric properties for the ceramic samples and upside-down composite samples made with corresponding ceramic fillers**

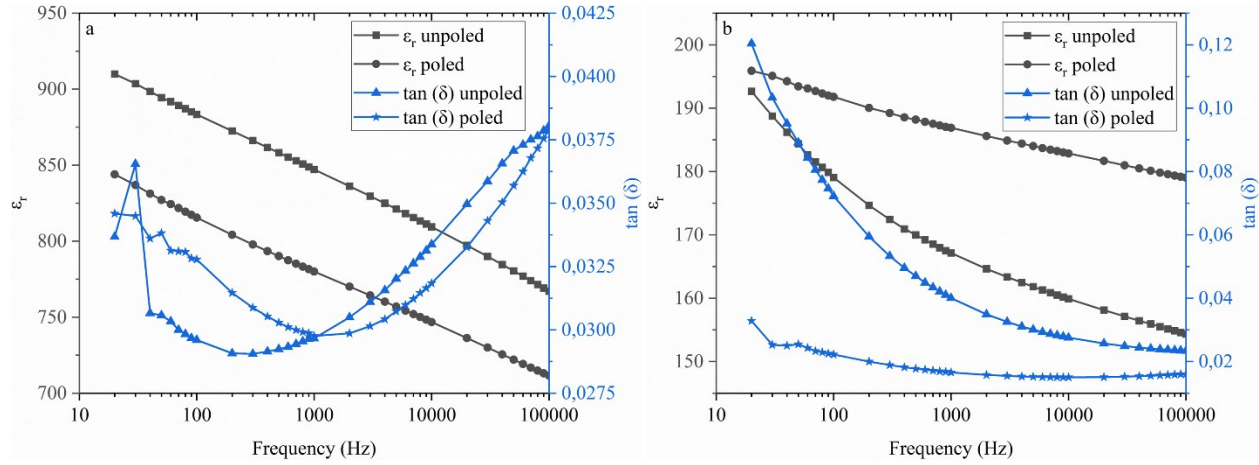

Figure S9. Dependence of relative permittivity ( $\epsilon_r$ ) and dielectric loss ( $\tan(\delta)$ ) on frequency for unpoled and poled (a) KNBNNO-P and (b) KNBNNO-C measured at room temperature in the dark

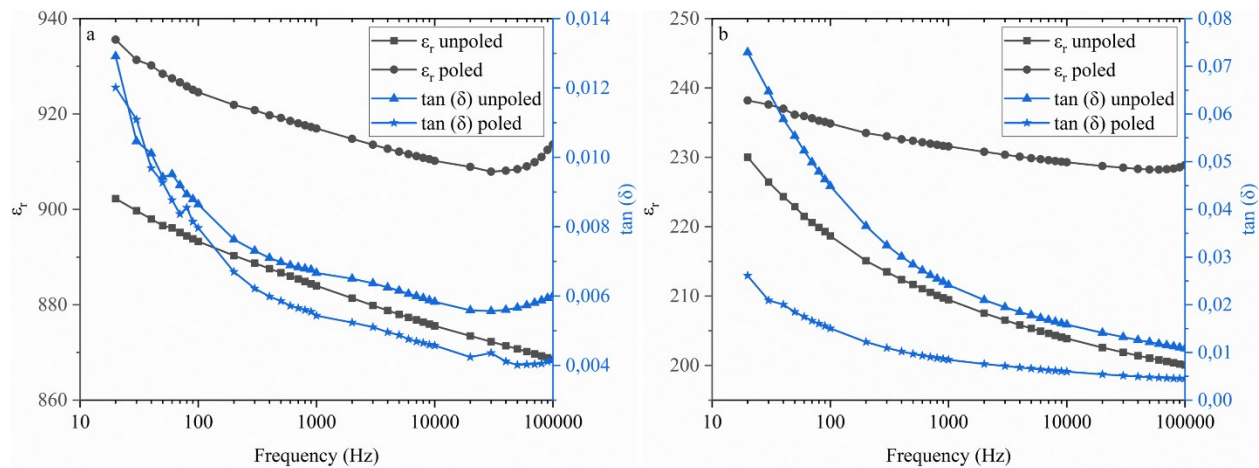

Figure S10. Dependence of  $\epsilon_r$  and  $\tan(\delta)$  on frequency for unpoled and poled (a) H-PZT-P and (b) H-PZT-C measured at room temperature in the dark

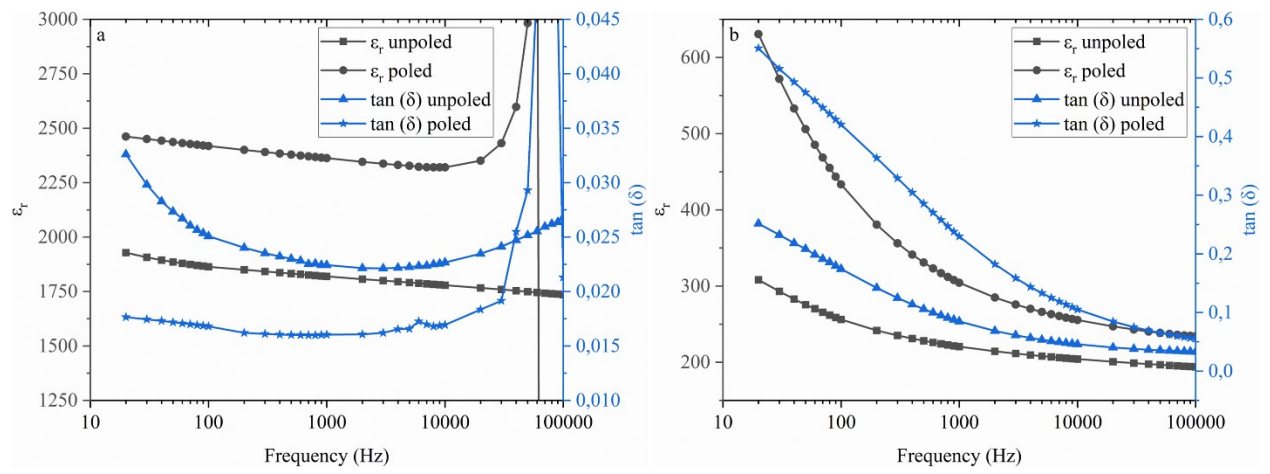

Figure S11. Dependence of  $\epsilon_r$  and  $\tan(\delta)$  on frequency for unpoled and poled (a) S-PZT-P and (b) S-PZT-C measured at room temperature in the dark
